# Supplementary material for: Prognostic value of National Early Warning Score and Modified Early Warning Score on intensive care unit readmission and mortality: A prospective observational study
Source: PubMed Central journal article supplement (PMC9386480; doi:10.3389/fmed.2022.938005), 2022-08-04
Supplement: Data_Sheet_1.pdf [file Data_Sheet_1.pdf]

**A**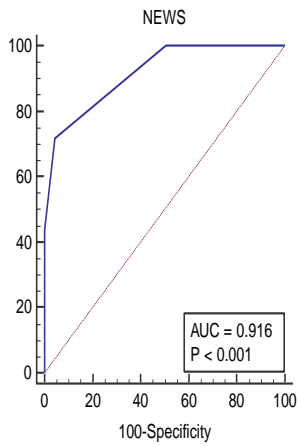**B**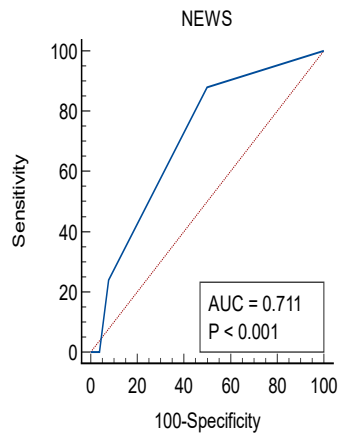**C**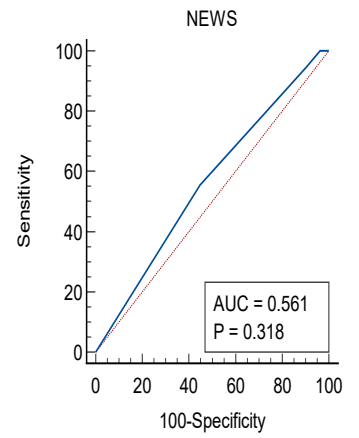**D**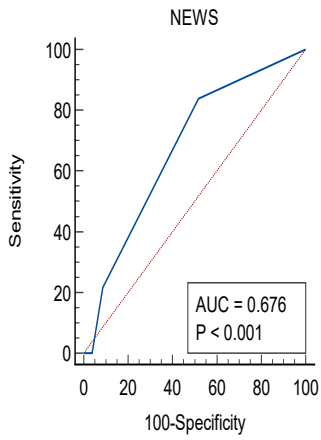**E**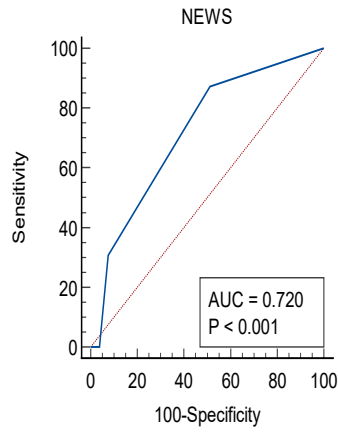**F**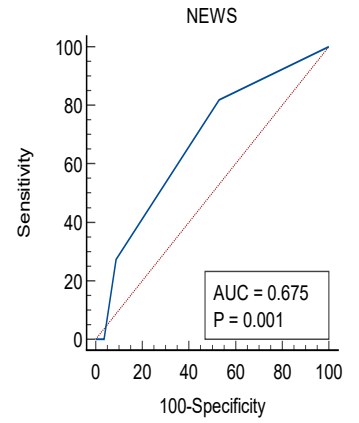**G**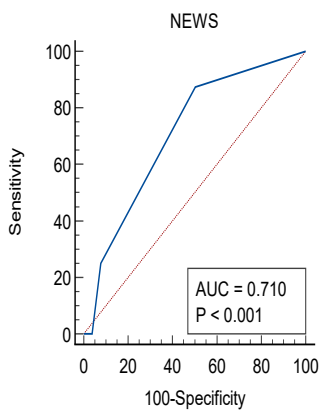

**Supplementary Figure 1:** ROC curves of NEWS score to predict (A) mortality, (B) ICU readmission, (C) unplanned discharge type, (D) interval of readmission  $\geq 4$  days, (E) MV readmission, (F) duration of MV  $\geq 6$  days, and (G) multiple organ failure

**A**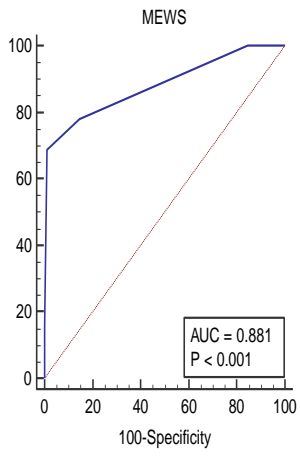**B**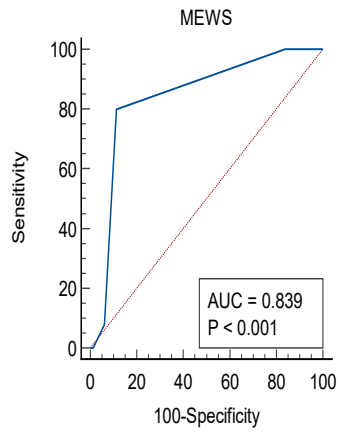**C**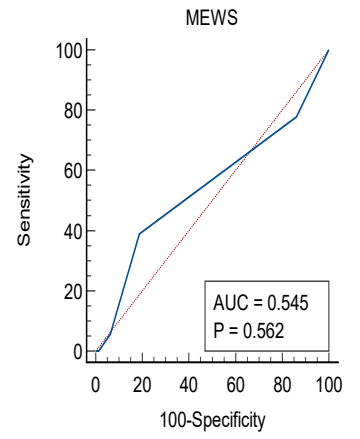**D**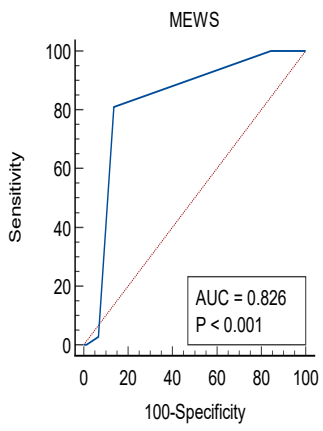**E**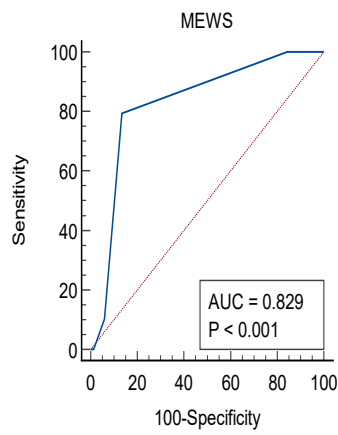**F**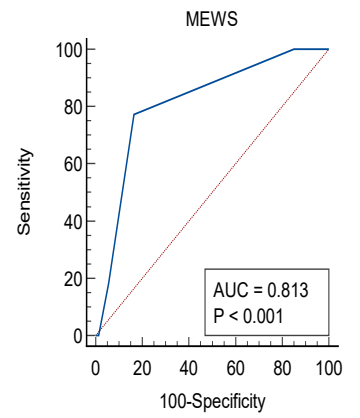**G**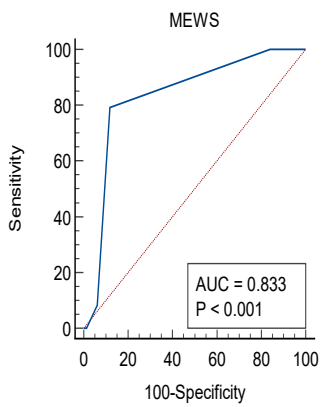

**Supplementary Figure 2:** ROC curves of MEWS score to predict (A) mortality, (B) ICU readmission, (C) unplanned discharge type, (D) interval of readmission  $\geq 4$  days, (E) MV readmission, (F) duration of MV  $\geq 6$  days, and (G) multiple organ failure
